# Supplementary material for: Impact of meteorological conditions on the biogenic volatile organic compound (BVOC) emission rate from eastern Mediterranean vegetation under drought
Source: Copernicus journal article supplement (doi:10.5194/bg-21-4133-2024), 2024-09-24
Supplement: Supplementary file 1 [file bg-21-4133-2024-supplement.pdf]

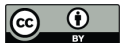

*Supplement of*

**Impact of meteorological conditions on the biogenic volatile organic compound (BVOC) emission rate from eastern Mediterranean vegetation under drought**

**Qian Li et al.**

*Correspondence to:* Eran Tas ([eran.tas@mail.huji.ac.il](mailto:eran.tas@mail.huji.ac.il))

The copyright of individual parts of the supplement might differ from the article licence.

## S1. Preparation of calibration curve for GC–MS

The calibration curve evaluation was conducted with standards of selected volatile organic compounds (VOCs), including monoterpenes (MTs) and sesquiterpenes (SQTs). Two calibration series were conducted. For each series, different solutions were injected into the same measurement sorbent tubes. Then the linear regression fitting function was evaluated based on calculation of the peak area counts vs. VOC mass ( $\mu\text{g}$ ). The first-series calibration was applied for six VOCs, where the sampled solution base was mixed with 5  $\mu\text{L}$  of each compound. Among them, *cis*- $\beta$ -ocimene and  $\beta$ -caryophyllene were detected in our research. In the second series of calibrations, we calibrated  $\alpha$ -humulene, germacrene D, and  $\alpha$ -farnesene. Some details of the standards for the VOCs are shown in Table S1.

**Table S1.** Summary of calibration compounds' input.

| Compound name                 | Density ( $\text{g mL}^{-1}$ ) | Standard volume added ( $\mu\text{L}$ ) |
|-------------------------------|--------------------------------|-----------------------------------------|
| <i>cis</i> - $\beta$ -Ocimene | 0.8                            | 5                                       |
| $\beta$ -Caryophyllene        | 0.905                          | 5                                       |
| $\alpha$ -Humulene            | 0.88                           | 5                                       |
| Germacrene D                  | 0.85                           | 5                                       |
| $\alpha$ -Farnesene           | 0.81                           | 5                                       |

From the initial solution, we prepared 12 and 7 solutions with different concentrations as summarized in Tables S2 and S3 for the first and second calibration series, respectively.

**Table S2.** Concentration of solutions for the first-series calibration.

| <b>Solution</b>   | <b>Volume of solutes</b>    | <b>Methanol solvent (μL)</b> | <b>Concentration (ng μL<sup>-1</sup>)</b> | <b>Mass of standard in 4 μL injected in the tube (ng)</b> |
|-------------------|-----------------------------|------------------------------|-------------------------------------------|-----------------------------------------------------------|
| <b>GIL-080221</b> | <b>5 μL</b>                 | <b>500</b>                   | <b>~10,000</b>                            |                                                           |
| <b>Sol 1</b>      | <b>100 μL of GIL-080221</b> | <b>900</b>                   | <b>1000</b>                               |                                                           |
| <b>Sol 2</b>      | 250 μL of Sol 1             | 750                          | 250                                       | 1000                                                      |
| <b>Sol 3</b>      | 500 μL of Sol 2             | 500                          | 125                                       | 500                                                       |
| <b>Sol 4</b>      | 500 μL of Sol 3             | 500                          | 62.5                                      | 250                                                       |
| <b>Sol 5</b>      | 500 μL of Sol 4             | 500                          | 31.25                                     | 125                                                       |
| <b>Sol 6</b>      | 500 μL of Sol 5             | 500                          | 15.625                                    | 62.5                                                      |
| <b>Sol 7</b>      | 500 μL of Sol 6             | 500                          | 7.8125                                    | 31.25                                                     |
| <b>Sol 8</b>      | 480 μL of Sol 7             | 520                          | 3.75                                      | 15                                                        |
| <b>Sol 9</b>      | 500 μL of Sol 8             | 500                          | 1.875                                     | 7.5                                                       |
| <b>Sol 10</b>     | 500 μL of Sol 9             | 500                          | 0.9375                                    | 3.75                                                      |
| <b>Sol 11</b>     | 533 μL of Sol 10            | 467                          | 0.5                                       | 2                                                         |
| <b>Sol 12</b>     | 500 μL of Sol 11            | 500                          | 0.25                                      | 1                                                         |

**Table S3.** Concentration of solutions for the second-series calibration

| <b>Solution</b> | <b>Volume of solutes</b> | <b>Methanol solvent</b> | <b>Concentration (ng μL<sup>-1</sup>)</b> | <b>Mass of standard in 4 μL injected in the tube (ng)</b> |
|-----------------|--------------------------|-------------------------|-------------------------------------------|-----------------------------------------------------------|
| <b>Sol 1</b>    |                          |                         | <b>500</b>                                | <b>2000</b>                                               |
| <b>Sol 2</b>    | 100 μL of Sol 1          | 100                     | 250                                       | 1000                                                      |
| <b>Sol 3</b>    | 100 μL of Sol 2          | 100                     | 125                                       | 500                                                       |
| <b>Sol 4</b>    | 100 μL of Sol 3          | 100                     | 62.5                                      | 250                                                       |
| <b>Sol 5</b>    | 100 μL of Sol 4          | 100                     | 31.25                                     | 125                                                       |
| <b>Sol 6</b>    | 100 μL of Sol 5          | 100                     | 15.625                                    | 62.5                                                      |
| <b>Sol 7</b>    | 100 μL of Sol 6          | 100                     | 7.8125                                    | 31.25                                                     |

The settings of the GC–MS for the standard calibrations are shown in Table S4 and were the same for both series.

**Table S4.** GC–MS analysis settings for the calibration curve evaluation of selected VOCs.

|                                                  |                                                                                                        |
|--------------------------------------------------|--------------------------------------------------------------------------------------------------------|
| Sample analysis method                           | Agilent GC–MSD system (7890A) EI Scan                                                                  |
| Column                                           | Restek 10623 Stabilwax                                                                                 |
| Autosampler                                      | Centri                                                                                                 |
| Injector temperature                             | 250 °C                                                                                                 |
| Oven temp.                                       | 45 °C (5 min), 5 °C min <sup>-1</sup> to 180 °C, 25 °C min <sup>-1</sup> to 250 °C                     |
| Mass range                                       | 41–350                                                                                                 |
| Gas                                              | Constant pressure (working with retention time lock for iso-butylbenzene at retention time of 7.5 min) |
| inj                                              | splitless                                                                                              |
| Threshold, sampling rate                         | 150, 2                                                                                                 |
| EMV mode                                         | Relative, 70 eV                                                                                        |
| MS source, quad auxiliary temperature            | 230 °C, 150 °C, 280 °C                                                                                 |
| Tube – desorption time<br>desorption temperature | 5 min<br>280 °C                                                                                        |
| Trap – desorption time<br>desorption temperature | 3 min (20 °C s <sup>-1</sup> to 300 °C)<br>300 °C                                                      |

The calibration curve results are presented in Figs. S1–S5, and are summarized in Table S5.

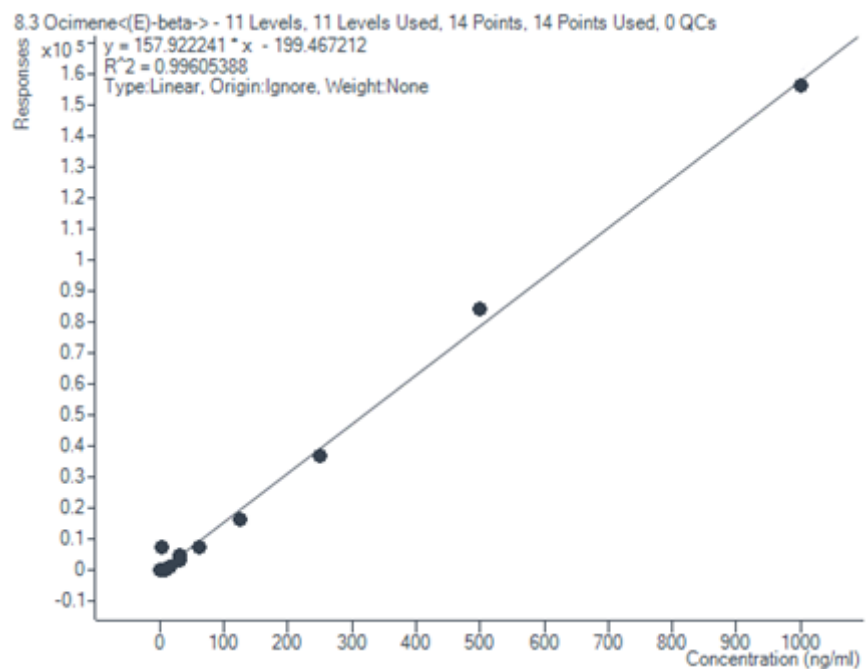

Figure S1. Calibration curve for  $\beta$ -ocimene (E)

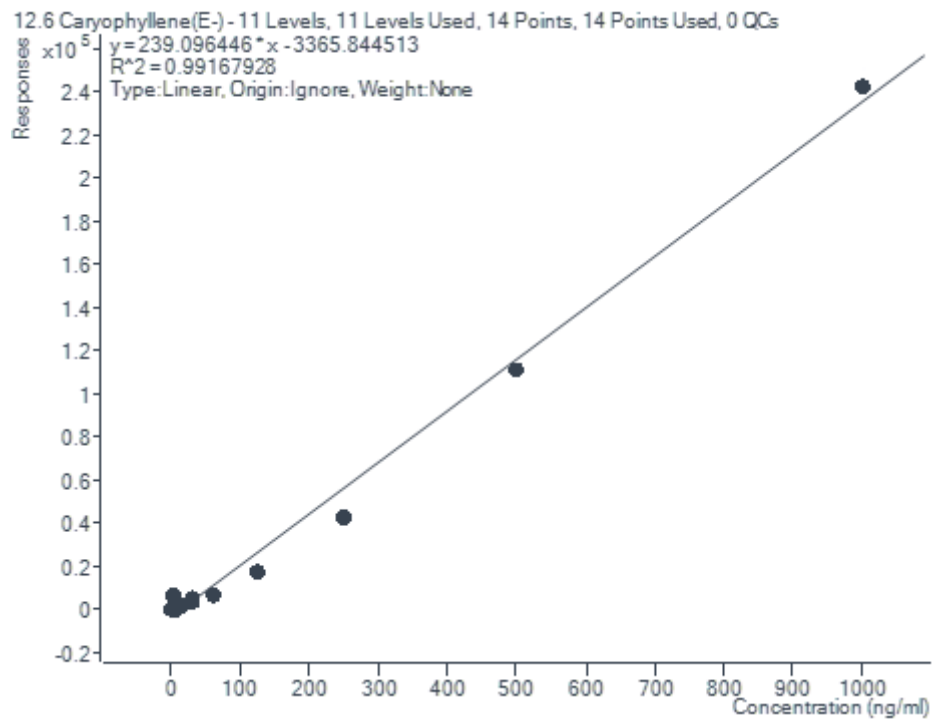

Figure S2. Calibration curve for  $\beta$ -caryophyllene

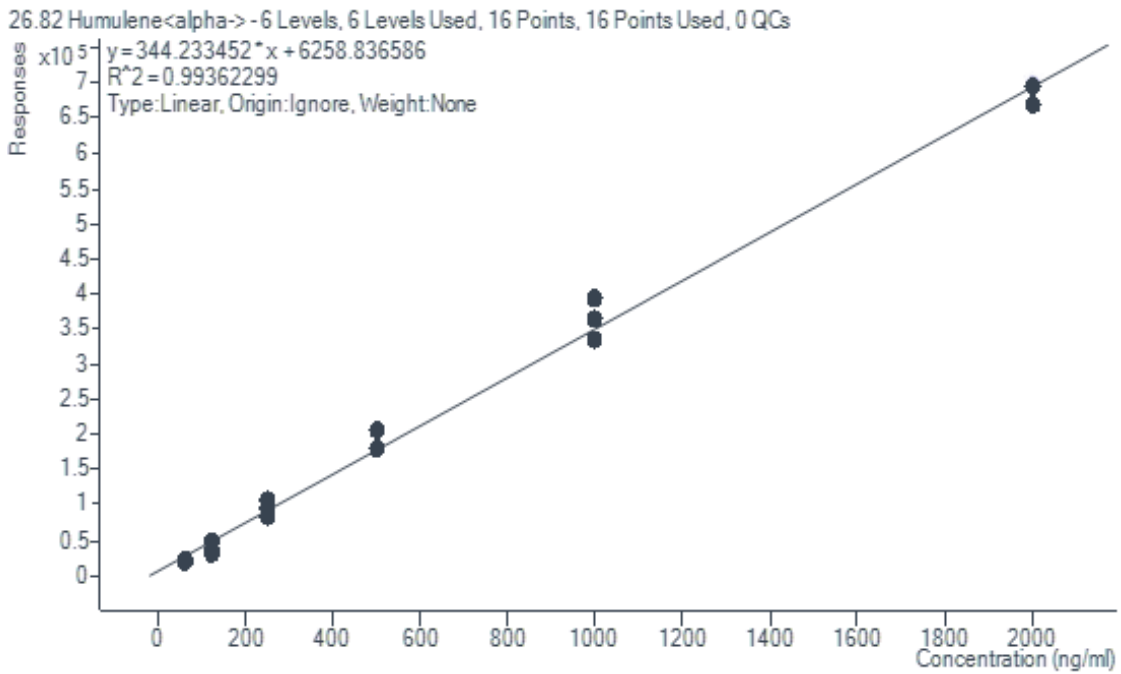

**Figure S3.** Calibration curve for  $\alpha$ -humulene

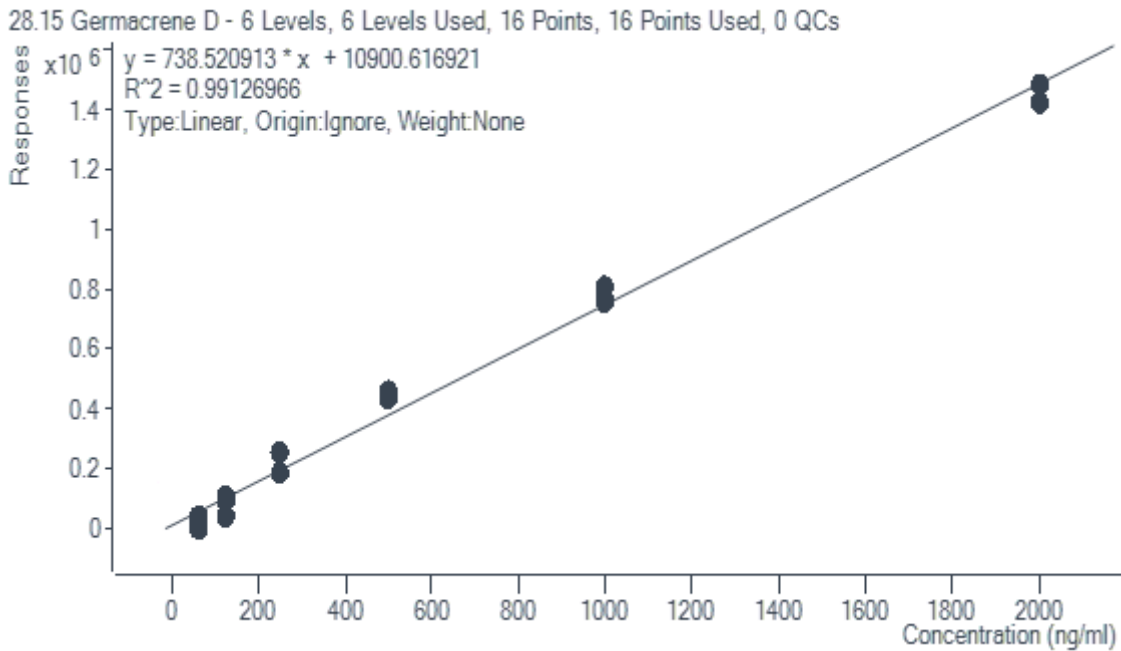

**Figure S4.** Calibration curve for germacrene D

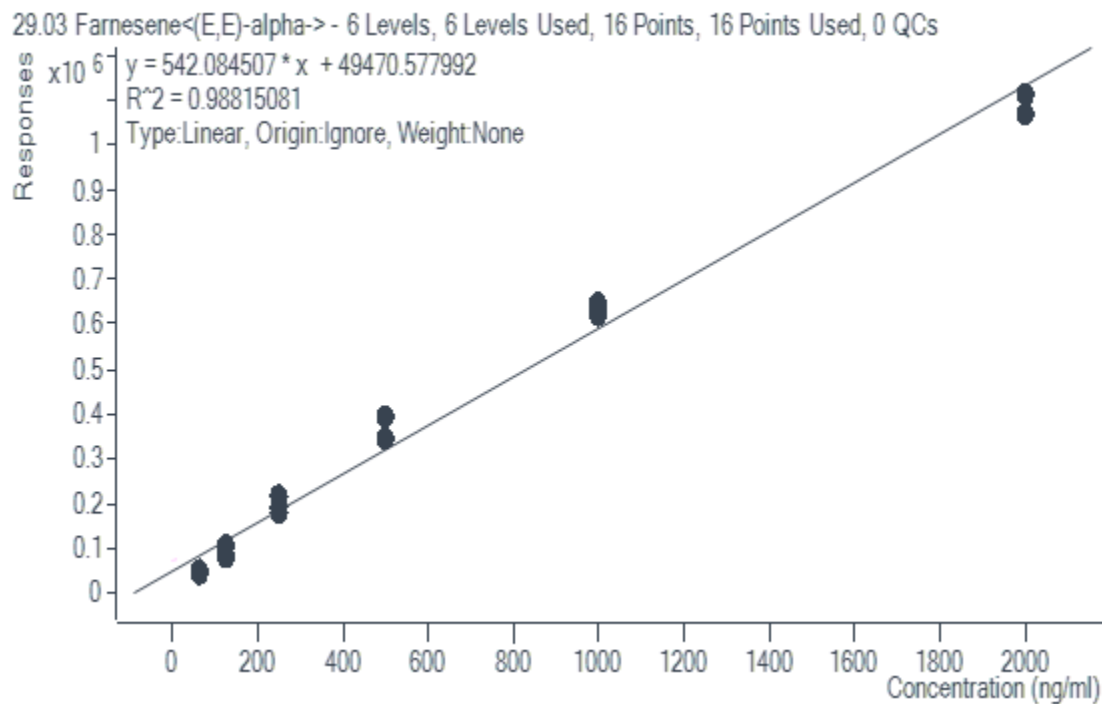

**Figure S5.** Calibration curve for  $\alpha$ -farnesene

**Table S5.** Regression equations for the five VOC compounds' standard calibration curves

| VOC compound name           | $r^2$ | Regression equation                 |
|-----------------------------|-------|-------------------------------------|
| <i>E</i> - $\beta$ -ocimene | 0.996 | $y = 157.9220 * x - 199.46$         |
| $\beta$ -Caryophyllene      | 0.991 | $y = 239.096 * x - 3365.84$         |
| $\alpha$ -Humulene          | 0.993 | $y = 344.233452 * x + 6258.836586$  |
| Germacrene D                | 0.991 | $y = 738.626951 * x - 4579.005169$  |
| $\alpha$ -Farnesene         | 0.994 | $y = 617.012200 * x + 22800.770090$ |

## S2. Linear and hyperbolic correlation between MTs/SQTs and temporal changes in RH ( $\delta_{RH}$ )

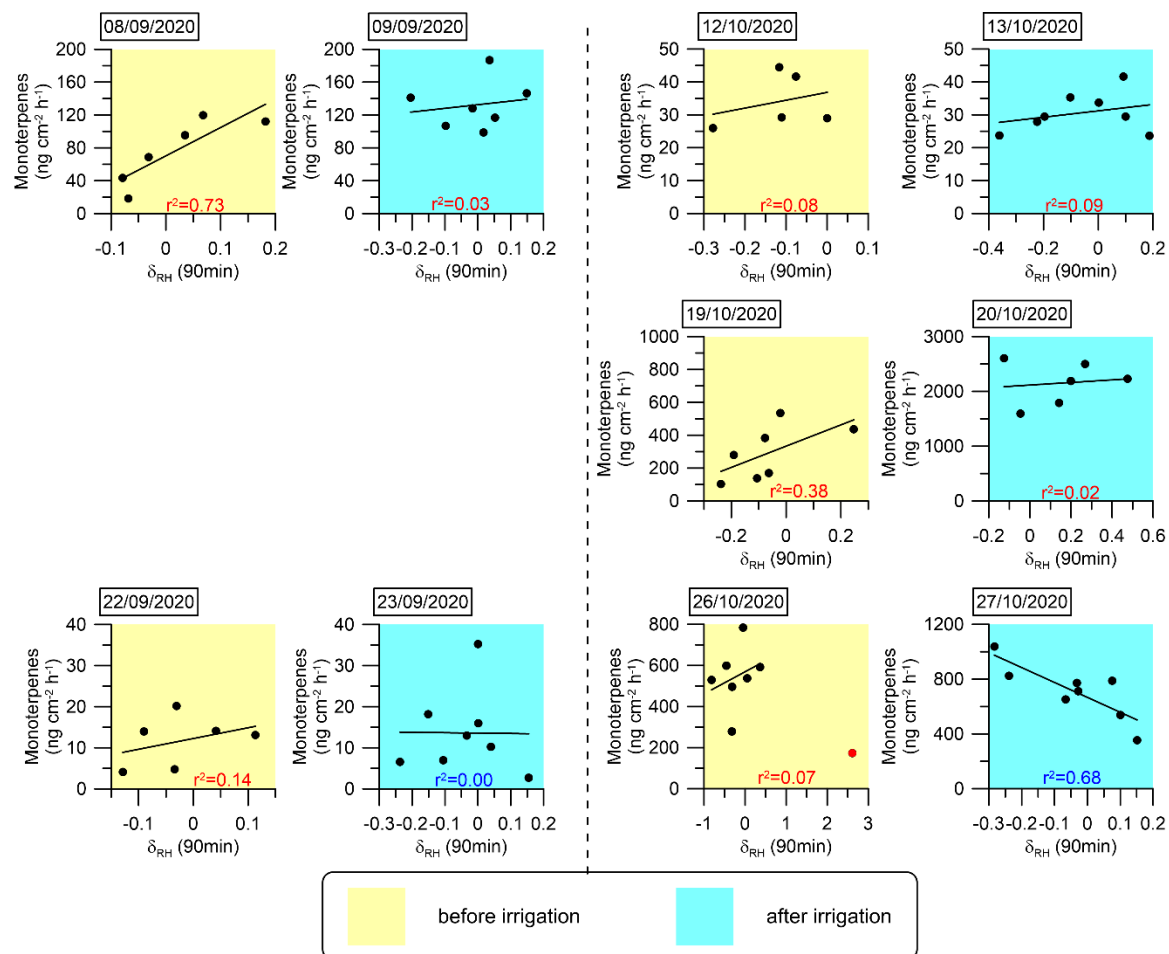

**Figure S6.** Daily correlations between MT emission fluxes and  $\delta_{RH}$ . A linear fitting function is used for the fitting curves. The coefficient of determination ( $r^2$ ) for each day is marked in red or blue when the correlation is positive or negative, respectively.



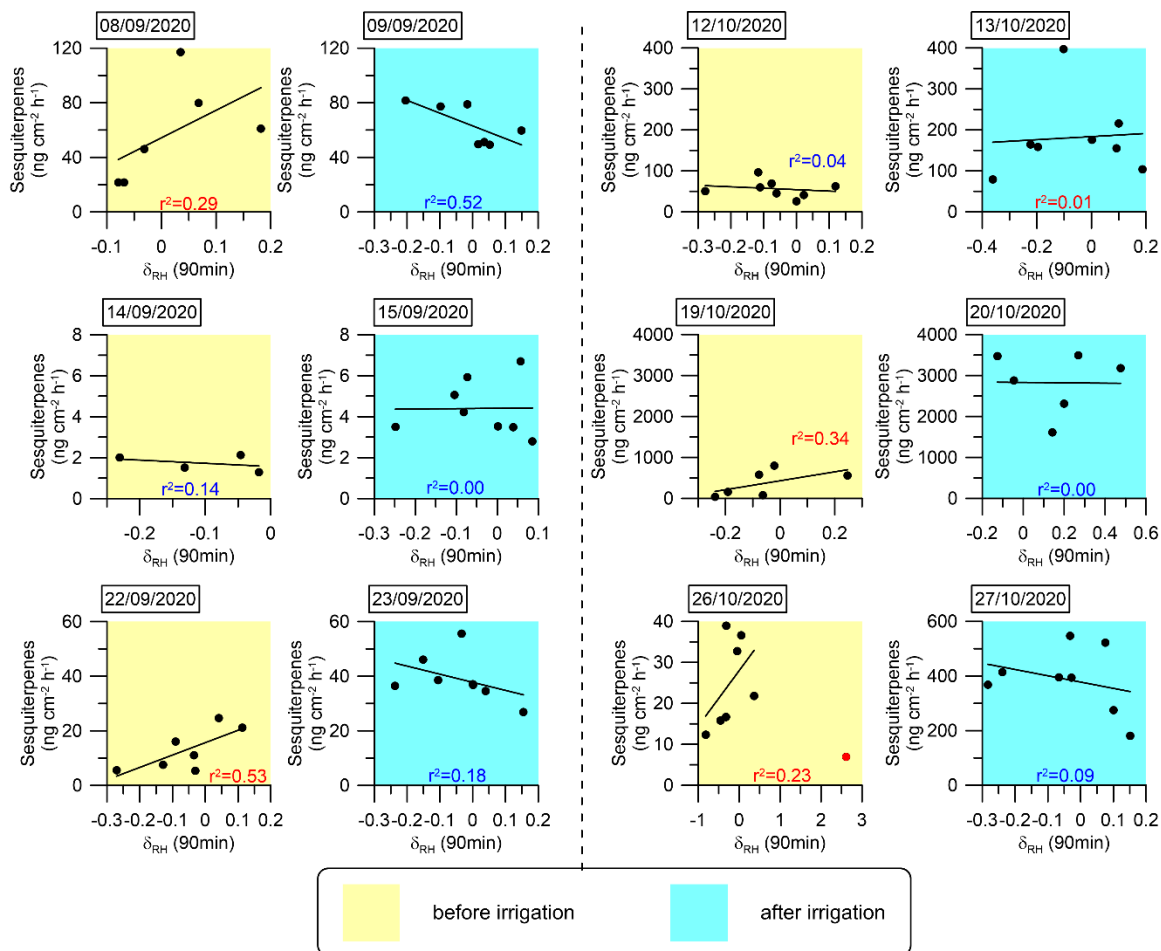

**Figure S7.** Daily correlations between SQT emission fluxes and  $\delta_{RH}$ . A linear fitting function is used for the fitting curves. The coefficient of determination ( $r^2$ ) for each day is marked in red or blue when the correlation is positive or negative, respectively. The sample at 12:10 h on 26 Oct 2020 (marked in red) was not considered in the fitting curve for that day, because an extremely sharp increase in RH (from 10 to 31%) occurred within 10 min, which we considered an outlier.

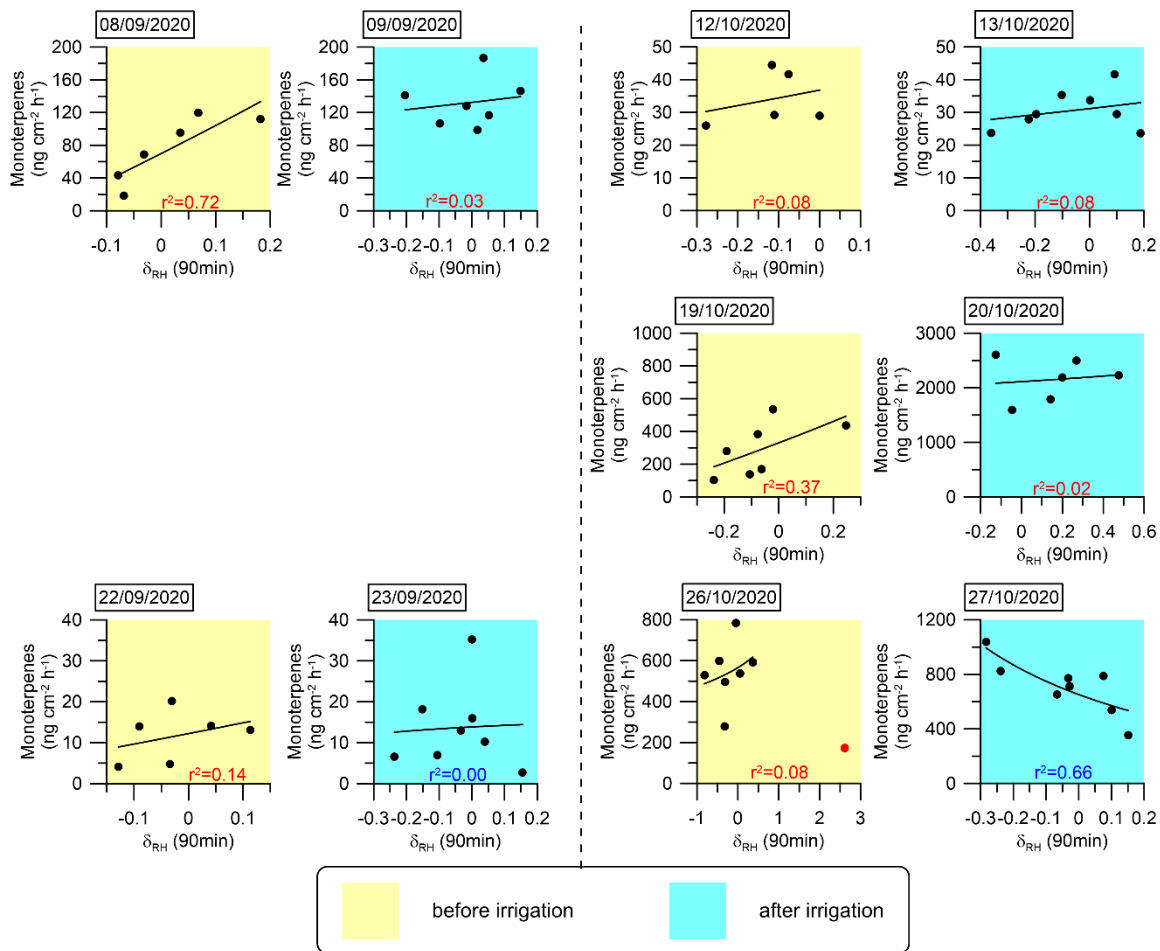

**Figure S8.** Daily correlations between MT emission fluxes and  $\delta_{RH}$ . A hyperbolic fitting function was used for the fitting curves. The coefficient of determination ( $r^2$ ) for each day is marked in red or blue when the correlation is positive or negative, respectively.

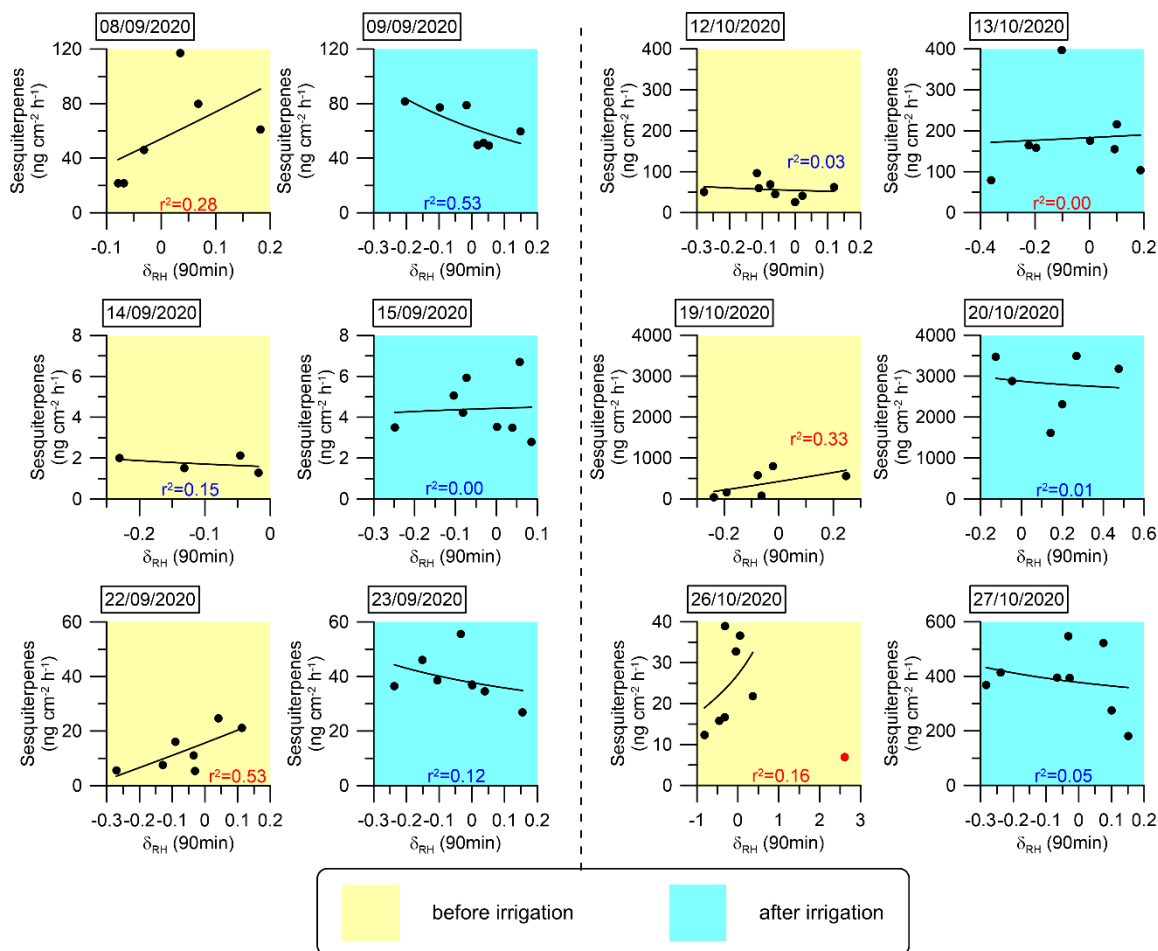

**Figure S9** Daily correlations between SQT emission fluxes and  $\delta_{RH}$ . A hyperbolic fitting function was used for the fitting curves. The coefficient of determination ( $r^2$ ) for each day is marked in red or blue when the correlation is positive or negative, respectively. The sample at 12:10 h on 26 Oct 2020 (marked in red) was not considered in the fitting curve for that day, because an extremely sharp increase in RH (from 10 to 31%) occurred within 10 min, which we considered an outlier.

### S3. Exponential correlation between MTs/SQTs and RH

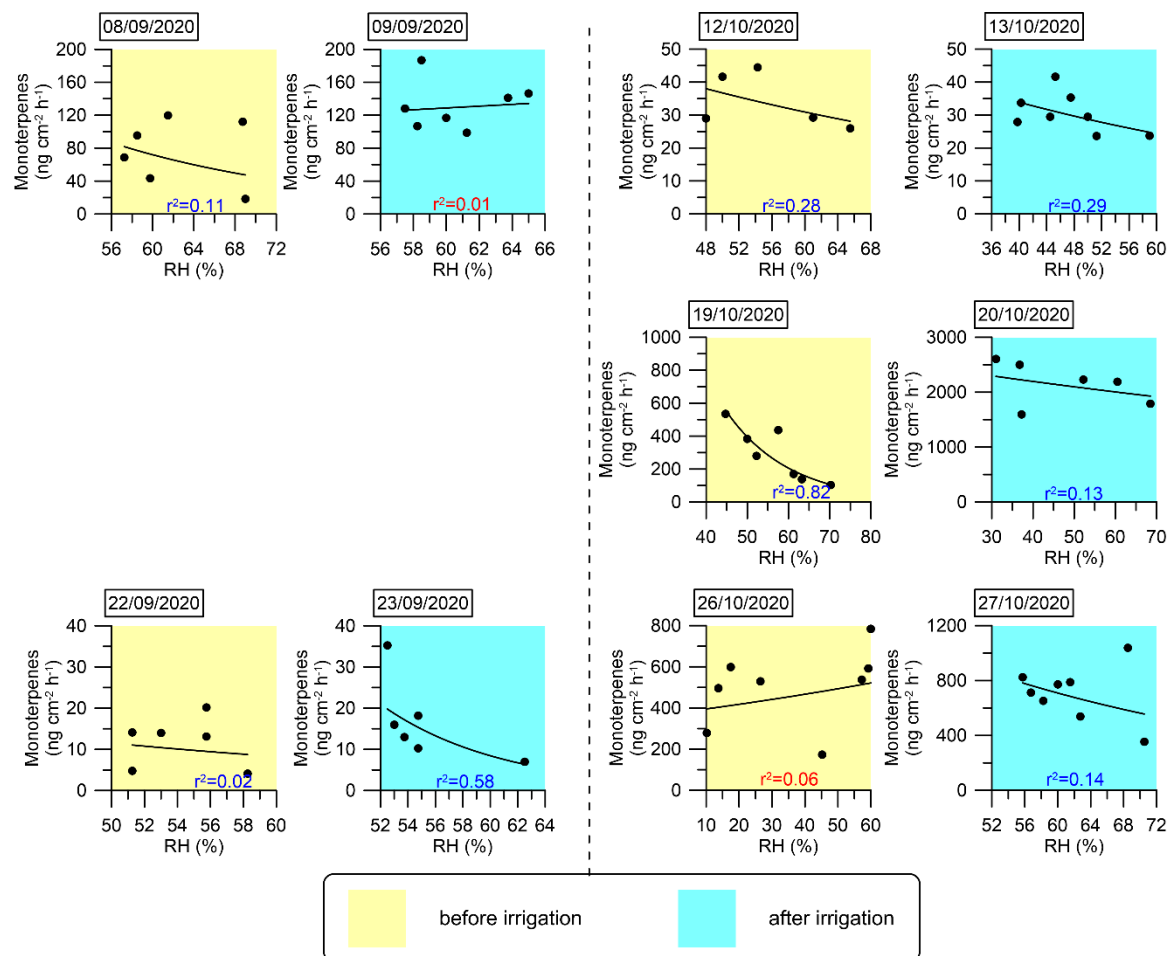

**Figure S10.** Daily correlations between MT emission fluxes and RH. A linear fitting function was used for the fitting curves. The coefficient of determination ( $r^2$ ) for each day is marked in red or blue when the correlation is positive or negative, respectively.

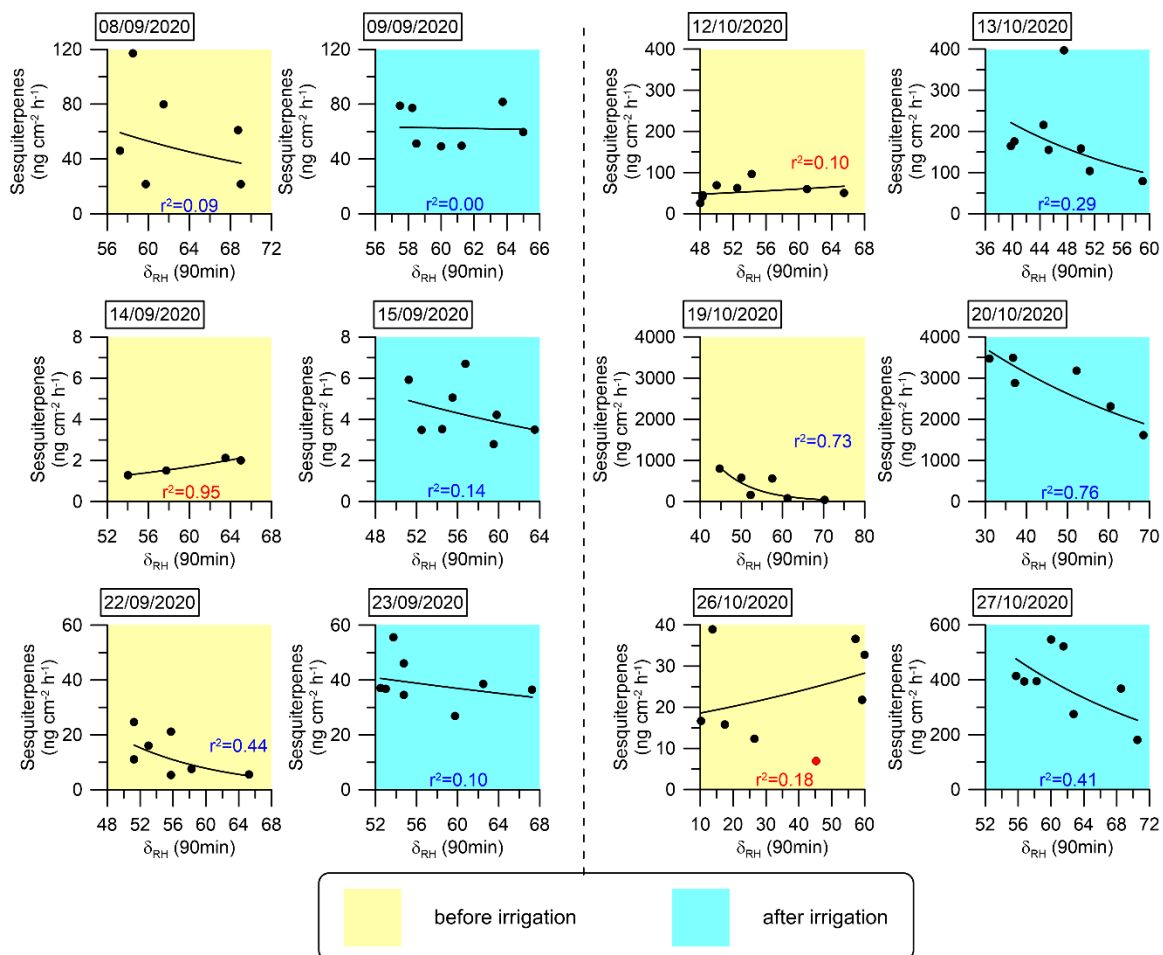

**Figure S11.** Daily correlations between SQT emission fluxes and RH. A linear fitting function was used for the fitting curves. The coefficient of determination ( $r^2$ ) for each day is marked in red or blue when the correlation is positive or negative, respectively. The sample at 12:10 h on 26 Oct 2020 (marked in red) was not considered in the fitting curve for that day, because an extremely sharp increase in RH (from 10 to 31%) occurred within 10 min, which we considered an outlier.
